# Supplementary material for: SpecLipIDA: a pseudotargeted lipidomics approach for polyunsaturated fatty acids in milk
Source: Royal Society of Chemistry journal article supplement (doi:10.1039/d3an01536j), 2024-01-01
Supplement: d3an01536j1.pdf [file d3an01536j1.pdf]

The Supplementary Information includes following items:

Figure S1. The spectra of TG 22:6/22:6/22:6 in (A) IDA and (B) SWATH; PC 18:0/20:5 in (C) IDA and (D) SWATH; PE 20:4/20:4 in (E) IDA and (F) SWATH.

Figure S2. Fragmentation principle of PUFA lipids. (A) TG 20:4/20:4/20:4; (B) TG 20:5/20:5/20:5; (C) TG 22:6/22:6/22:6; (D) PC 20:4/20:4; (E) PC 18:0/20:5; (F) PC 16:0/22:6; (G) PE 20:4/20:4; (H) PE 18:0/20:5; (I) PE 16:0/22:6.

Figure S3. OPLS-DA analysis.

Figure S4. The total relative content of PUFA lipids in the six milks.

Table S1. Identification of PUFA lipids.

Table S2. Distribution of PUFA lipids in six milk samples.

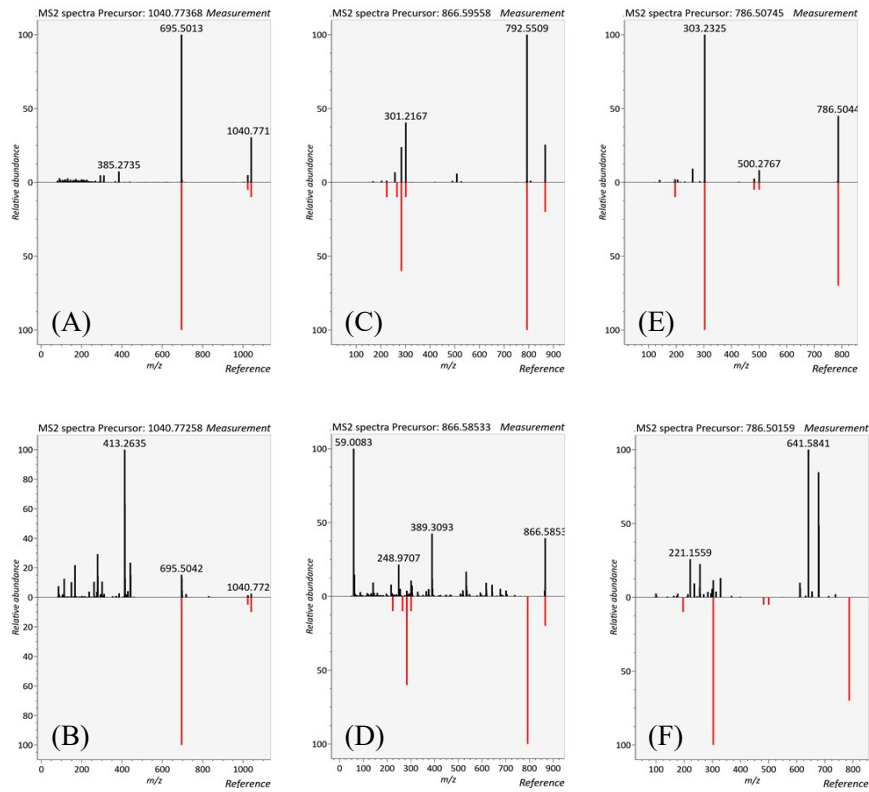

Figure S1. The spectra of TG 22:6/22:6/22:6 in (A) IDA and (B) SWATH; PC 18:0/20:5 in (C) IDA and (D) SWATH; PE 20:4/20:4 in (E) IDA and (F) SWATH.

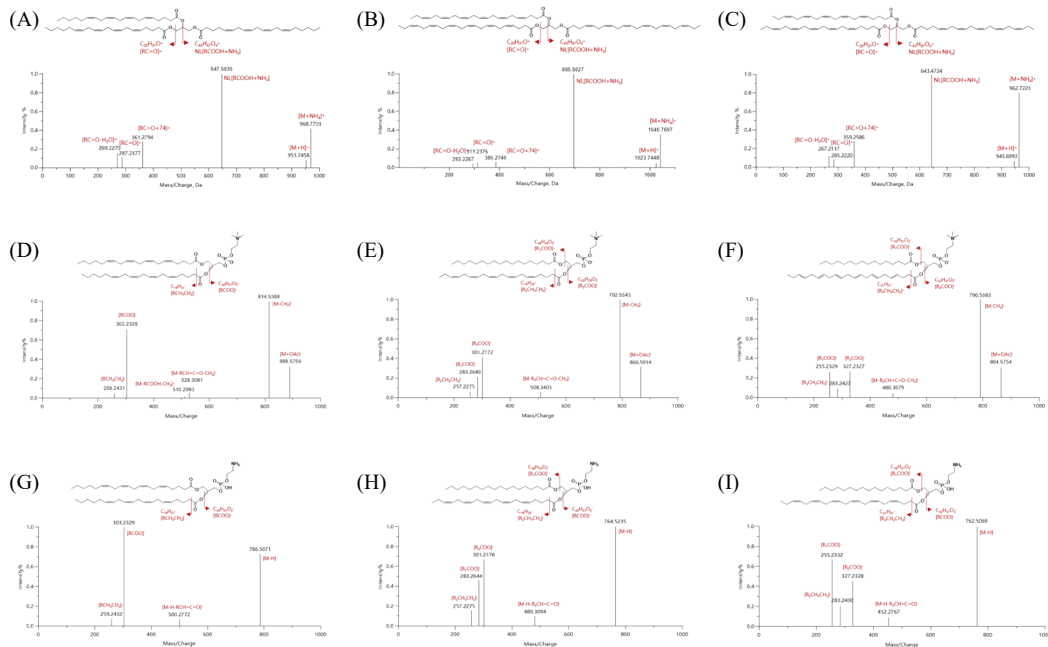

Figure S2. Fragmentation principle of PUFA lipids. (A) TG 20:4/20:4/20:4; (B) TG 20:5/20:5/20:5; (C) TG 22:6/22:6/22:6; (D) PC 20:4/20:4; (E) PC 18:0/20:5; (F) PC 16:0/22:6; (G) PE 20:4/20:4; (H) PE 18:0/20:5; (I) PE 16:0/22:6.

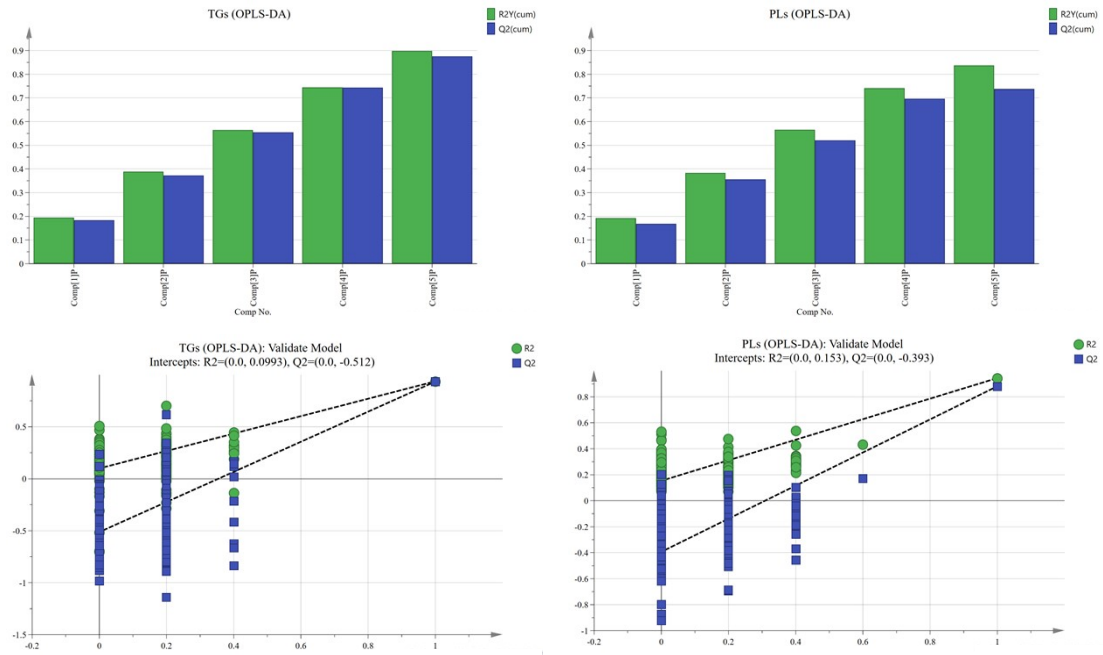

Figure S3. OPLS-DA analysis.

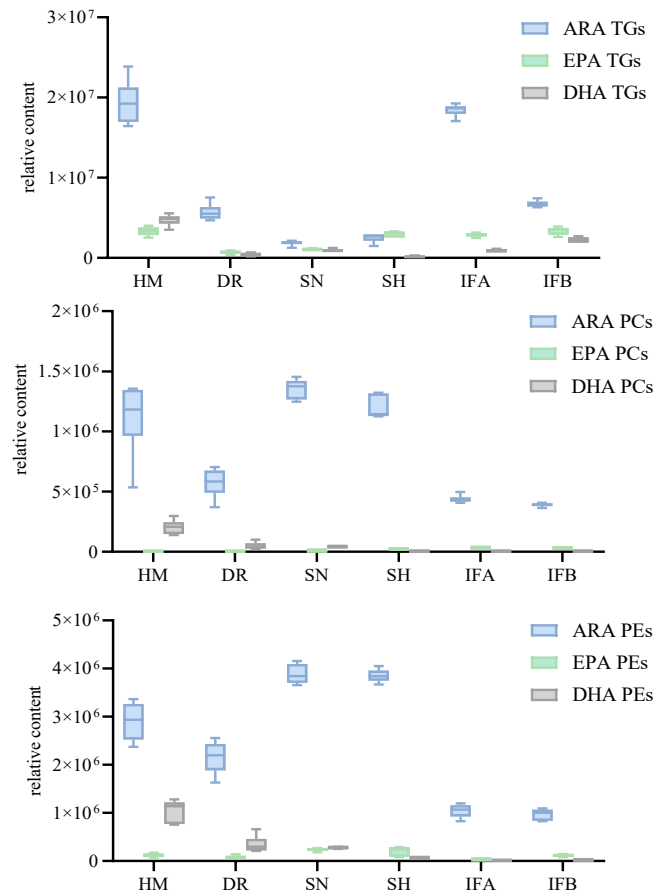

Figure S4. The total relative content of PUFA lipids in the six milks.

Table S1. Identification of PUFA lipids.

| Class | m/z      | Adduct ion                        | Retention time | Sum composition | Molecular lipid                                    | Mass error |
|-------|----------|-----------------------------------|----------------|-----------------|----------------------------------------------------|------------|
| TG    | 732.6131 | [M+NH <sub>4</sub> ] <sup>+</sup> | 6.764          | 42:4            | 20:4/10:0/12:0<br>20:4/16:0/6:0                    | 0.78       |
|       | 756.6229 | [M+NH <sub>4</sub> ] <sup>+</sup> | 6.501          | 44:6            | 22:6/14:0/8:0                                      | 12.20      |
|       | 758.6336 | [M+NH <sub>4</sub> ] <sup>+</sup> | 6.681          | 44:5            | 20:4/16:1/8:0                                      | 5.64       |
|       | 760.6452 | [M+NH <sub>4</sub> ] <sup>+</sup> | 7.171          | 44:4            | 20:4/10:0/14:0<br>20:4/16:0/8:0<br>22:6/10:0/14:0  | 0.30       |
|       | 784.6486 | [M+NH <sub>4</sub> ] <sup>+</sup> | 7.076          | 46:6            | 22:6/12:0/12:0<br>22:6/16:0/8:0                    | 4.63       |
|       | 786.6635 | [M+NH <sub>4</sub> ] <sup>+</sup> | 7.208          | 46:5            | 20:4/10:0/16:1<br>20:4/18:1/8:0                    | 3.66       |
|       | 788.6755 | [M+NH <sub>4</sub> ] <sup>+</sup> | 7.829          | 46:4            | 20:4/10:0/16:0<br>20:4/12:0/14:0<br>20:4/18:0/8:0  | 0.98       |
|       | 812.6858 | [M+NH <sub>4</sub> ] <sup>+</sup> | 7.685          | 48:6            | 22:6/10:0/16:0<br>22:6/12:0/14:0                   | 11.73      |
|       | 814.6983 | [M+NH <sub>4</sub> ] <sup>+</sup> | 7.765          | 48:5            | 20:4/10:0/18:1<br>20:4/12:0/16:1<br>20:4/14:0/14:1 | 7.83       |
|       | 816.7052 | [M+NH <sub>4</sub> ] <sup>+</sup> | 8.282          | 48:4            | 20:4/10:0/18:0<br>20:4/12:0/16:0<br>20:4/14:0/14:0 | 2.90       |

|          |                                   |       |      |                                                                      |      |
|----------|-----------------------------------|-------|------|----------------------------------------------------------------------|------|
| 840.7038 | [M+NH <sub>4</sub> ] <sup>+</sup> | 7.995 | 50:6 | 20:4/12:0/18:2<br>20:5/12:0/18:1<br>22:6/12:0/16:0<br>22:6/14:0/14:0 | 4.48 |
| 842.7239 | [M+NH <sub>4</sub> ] <sup>+</sup> | 8.306 | 50:5 | 20:4/12:0/18:1<br>20:4/14:0/16:1<br>20:4/14:1/16:0                   | 0.81 |
| 844.7381 | [M+NH <sub>4</sub> ] <sup>+</sup> | 8.622 | 50;4 | 20:4/12:0/18:0<br>20:4/14:0/16:0<br>20:4/15:0/15:0                   | 0.91 |
| 858.7478 | [M+NH <sub>4</sub> ] <sup>+</sup> | 8.780 | 51:4 | 20:4/14:0/17:0<br>20:4/15:0/16:0                                     | 7.83 |
| 864.7136 | [M+NH <sub>4</sub> ] <sup>+</sup> | 7.791 | 52:8 | 22:6/12:0/18:2                                                       | 6.97 |
| 866.7174 | [M+NH <sub>4</sub> ] <sup>+</sup> | 8.179 | 52:7 | 22:6/12:0/18:1<br>20:4/14:0/18:2                                     | 6.71 |
| 868.7464 | [M+NH <sub>4</sub> ] <sup>+</sup> | 8.357 | 52:6 | 20:4/16:1/16:1<br>20:5/16:0/16:1<br>22:6/14:0/16:0                   | 4.06 |
| 870.7588 | [M+NH <sub>4</sub> ] <sup>+</sup> | 8.756 | 52:5 | 20:4/14:0/18:1<br>20:4/14:1/18:0<br>20:4/16:0/16:1                   | 4.92 |
| 884.772  | [M+NH <sub>4</sub> ] <sup>+</sup> | 8.952 | 53:5 | 20:4/15:0/18:1<br>20:4/16:0/17:1                                     | 2.07 |
| 894.7564 | [M+NH <sub>4</sub> ] <sup>+</sup> | 8.408 | 54:7 | 20:5/16:1/18:1<br>20:5/17:1/17:1                                     | 2.10 |

|          |                                   |       |       |                |       |
|----------|-----------------------------------|-------|-------|----------------|-------|
|          |                                   |       |       | 20:4/16:0/18:2 |       |
| 896.7726 | [M+NH <sub>4</sub> ] <sup>+</sup> | 8.683 | 54:6  | 20:4/16:1/18:1 | 2.71  |
|          |                                   |       |       | 20:5/16:0/18:1 |       |
|          |                                   |       |       | 22:6/16:0/16:0 |       |
| 898.7727 | [M+NH <sub>4</sub> ] <sup>+</sup> | 9.110 | 54:5  | 20:4/16:0/18:1 | 14.60 |
|          |                                   |       |       | 20:4/16:1/18:0 |       |
| 900.8008 | [M+NH <sub>4</sub> ] <sup>+</sup> | 9.468 | 54:4  | 20:4/16:0/18:0 | 0.74  |
| 912.7155 | [M+NH <sub>4</sub> ] <sup>+</sup> | 7.353 | 56:12 | 22:6/12:0/22:6 | 8.69  |
| 912.8087 | [M+NH <sub>4</sub> ] <sup>+</sup> | 9.360 | 55:5  | 20:4/17:0/18:1 | 7.92  |
|          |                                   |       |       | 20:4/16:0/20:4 |       |
| 920.7671 | [M+NH <sub>4</sub> ] <sup>+</sup> | 8.708 | 56:8  | 20:4/18:1/18:3 | 3.33  |
|          |                                   |       |       | 20:4/18:2/18:2 |       |
|          |                                   |       |       | 20:5/18:1/18:2 |       |
|          |                                   |       |       | 20:4/18:1/18:2 |       |
| 922.7946 | [M+NH <sub>4</sub> ] <sup>+</sup> | 8.916 | 56:7  | 20:5/18:1/18:1 | 9.51  |
|          |                                   |       |       | 22:6/16:0/18:1 |       |
|          |                                   |       |       | 20:4/16:0/20:2 |       |
| 924.8026 | [M+NH <sub>4</sub> ] <sup>+</sup> | 9.298 | 56:6  | 20:4/18:0/18:2 | 1.22  |
|          |                                   |       |       | 20:4/18:1/18:1 |       |
|          |                                   |       |       | 20:5/18:0/18:1 |       |
| 926.8067 | [M+NH <sub>4</sub> ] <sup>+</sup> | 9.585 | 56:5  | 20:4/18:0/18:1 | 11.24 |
| 928.8339 | [M+NH <sub>4</sub> ] <sup>+</sup> | 9.942 | 56:4  | 20:4/16:0/20:0 | 1.22  |
|          |                                   |       |       | 20:4/18:0/18:0 |       |
| 940.7312 | [M+NH <sub>4</sub> ] <sup>+</sup> | 7.870 | 58:12 | 22:6/14:0/22:6 | 8.15  |
| 942.7691 | [M+NH <sub>4</sub> ] <sup>+</sup> | 8.062 | 58:11 | 20:4/18:3/20:4 | 15.47 |

|    |           |                                   |       |       |                                                    |       |
|----|-----------|-----------------------------------|-------|-------|----------------------------------------------------|-------|
|    | 944.7787  | [M+NH <sub>4</sub> ] <sup>+</sup> | 8.385 | 58:10 | 20:4/18:2/20:4<br>22:6/18:2/18:2                   | 9.03  |
|    | 946.7848  | [M+NH <sub>4</sub> ] <sup>+</sup> | 8.812 | 58:9  | 20:4/18:1/20:4<br>22:6/18:1/18:2                   | 1.08  |
|    | 948.7922  | [M+NH <sub>4</sub> ] <sup>+</sup> | 9.210 | 58:8  | 20:4/18:0/20:4<br>22:6/18:0/18:2<br>22:6/18:1/18:1 | 9.77  |
|    | 966.7501  | [M+NH <sub>4</sub> ] <sup>+</sup> | 7.889 | 60:13 | 22:6/16:1/22:6                                     | 4.57  |
|    | 968.7799  | [M+NH <sub>4</sub> ] <sup>+</sup> | 8.221 | 60:12 | 20:4/20:4/20:4<br>22:6/16:0/22:6                   | 10.04 |
|    | 1040.7787 | [M+NH <sub>4</sub> ] <sup>+</sup> | 7.619 | 66:18 | 22:6/22:6/22:6                                     | 8.20  |
|    | 812.5436  | [M+OAc] <sup>-</sup>              | 4.295 | 34:4  | 20:4/14:0                                          | 1.37  |
|    | 840.5768  | [M+OAc] <sup>-</sup>              | 4.958 | 36:4  | 20:4/16:0                                          | 0.94  |
|    | 862.5671  | [M+OAc] <sup>-</sup>              | 4.980 | 38:7  | 20:4/18:3<br>20:4/18:2                             | 7.81  |
|    | 864.577   | [M+OAc] <sup>-</sup>              | 4.530 | 38:6  | 20:5/18:1<br>22:6/16:0                             | 1.15  |
| PC | 866.5918  | [M+OAc] <sup>-</sup>              | 5.280 | 38:5  | 20:4/18:1<br>20:5/18:0                             | 0.16  |
|    | 868.6081  | [M+OAc] <sup>-</sup>              | 5.576 | 38:4  | 20:4/18:0                                          | 0.91  |
|    | 888.5789  | [M+OAc] <sup>-</sup>              | 4.690 | 40:8  | 22:6/18:2<br>20:4/20:3                             | 3.25  |
|    | 890.5991  | [M+OAc] <sup>-</sup>              | 4.749 | 40:7  | 22:6/18:1                                          | 8.35  |
|    | 892.6064  | [M+OAc] <sup>-</sup>              | 5.720 | 40:6  | 22:6/18:0                                          | 1.02  |
| PE | 708.4627  | [M-H] <sup>-</sup>                | 3.890 | 34:5  | 20:5/14:0                                          | 2.43  |
|    | 710.4766  | [M-H] <sup>-</sup>                | 3.920 | 34:4  | 20:4/14:0                                          | 1.22  |

|          |                    |       |      |           |       |
|----------|--------------------|-------|------|-----------|-------|
| 724.5018 | [M-H] <sup>-</sup> | 4.920 | 35:4 | 20:4/15:0 | 13.14 |
| 736.4921 | [M-H] <sup>-</sup> | 3.950 | 36:5 | 20:4/16:1 | 0.24  |
| 738.5074 | [M-H] <sup>-</sup> | 4.460 | 36:4 | 20:5/16:0 | 0.72  |
| 750.5156 | [M-H] <sup>-</sup> | 5.270 | 37:5 | 20:4/16:0 | 10.22 |
| 752.5246 | [M-H] <sup>-</sup> | 5.340 | 37:4 | 20:4/17:1 | 1.36  |
|          |                    |       |      | 20:4/17:0 |       |
|          |                    |       |      | 20:4/18:2 |       |
| 762.5094 | [M-H] <sup>-</sup> | 4.302 | 38:6 | 20:5/18:1 | 1.93  |
|          |                    |       |      | 22:6/16:0 |       |
| 764.5243 | [M-H] <sup>-</sup> | 4.540 | 38:5 | 20:4/18:1 | 0.94  |
| 766.54   | [M-H] <sup>-</sup> | 5.008 | 38:4 | 20:4/18:0 | 1.00  |
|          |                    |       |      | 20:4/20:4 |       |
| 786.5097 | [M-H] <sup>-</sup> | 4.010 | 40:8 | 22:6/18:2 | 2.25  |
|          |                    |       |      | 20:4/20:3 |       |
| 788.5244 | [M-H] <sup>-</sup> | 4.342 | 40:7 | 22:6/18:1 | 1.04  |
|          |                    |       |      | 22:6/18:0 |       |
| 790.5404 | [M-H] <sup>-</sup> | 4.840 | 40:6 | 22:6/18:0 | 1.48  |
| 792.5556 | [M-H] <sup>-</sup> | 5.020 | 40:5 | 20:4/20:1 | 0.91  |

Table S2. Distribution of PUFA lipids in six milk samples.

| Class | Molecular lipid | Formula  | MS2 Formula | HM (%) | DR (%)    | SN (%)    | SH (%)    | IFA (%) | IFB (%) | VIP    |
|-------|-----------------|----------|-------------|--------|-----------|-----------|-----------|---------|---------|--------|
| TG    | 20:4/10:0/12:0  | C45H78O6 | C35H59O4    |        | 0.02±0.01 | 0.05±0.01 |           |         |         | 0.6417 |
|       | 20:4/10:0/14:0  | C47H82O6 | C33H55O4    |        | 0.24±0.05 | 0.44±0.06 |           |         |         | 0.5624 |
|       | 20:4/10:0/16:0  | C49H86O6 | C33H55O4    |        | 0.7±0.12  |           | 1±0.14    |         |         | 0.1334 |
|       | 20:4/10:0/16:1  | C49H84O6 | C33H55O4    |        | 0.22±0.05 | 0.43±0.06 | 0.09±0.01 |         |         | 1.0153 |



|                |           |          |            |           |           |           |           |            |        |
|----------------|-----------|----------|------------|-----------|-----------|-----------|-----------|------------|--------|
| 20:4/10:0/18:0 | C51H90O6  | C33H55O4 |            | 0.07±0.06 | 0.11±0.06 | 0.93±0.29 |           |            | 1.4574 |
| 20:4/10:0/18:1 | C51H88O6  | C33H55O4 | 0.15±0.05  | 0.7±0.12  | 0.27±0.03 | 1±0.14    |           |            | 0.3641 |
| 20:4/12:0/14:0 | C49H86O6  | C35H59O4 |            |           |           | 0.14±0.03 |           |            | 1.5763 |
| 20:4/12:0/16:0 | C51H90O6  | C35H59O4 |            | 0.49±0.11 | 1±0.07    | 0.95±0.34 |           |            | 1.3566 |
| 20:4/12:0/16:1 | C51H88O6  | C35H59O4 |            | 0.13±0.07 |           | 0.11±0.03 |           |            | 0.2066 |
| 20:4/12:0/18:0 | C53H94O6  | C35H59O4 | 0.11±0.01  | 0.26±0.22 |           | 0.59±0.56 |           |            | 1.4169 |
| 20:4/12:0/18:1 | C53H92O6  | C35H59O4 | 0.13±0.05  | 0.49±0.11 | 1±0.07    | 1.11±0.07 |           |            | 1.1171 |
| 20:4/12:0/18:2 | C53H90O6  | C33H59O4 | 13.86±3.64 |           |           | 16.4±7.32 |           |            | 0.1097 |
| 20:4/14:0/14:0 | C51H90O6  | C37H63O4 |            | 0.15±0.03 | 0.23±0.03 | 0.22±0.01 |           |            | 1.3356 |
| 20:4/14:0/14:1 | C51H88O6  | C37H61O4 | 0.05±0.03  |           |           | 0.05±0.04 |           |            | 0.1415 |
| 20:4/14:0/16:0 | C53H94O6  | C37H63O4 | 0.4±0.07   | 0.31±0.21 |           | 0.11±0.06 |           |            | 2.1111 |
| 20:4/14:0/16:1 | C53H92O6  | C37H63O4 | 0.07±0.03  | 0.1±0.03  | 0.27±0.03 | 0.21±0.01 |           |            | 0.8205 |
| 20:4/14:0/17:0 | C54H96O6  | C40H69O4 |            |           |           | 0.05±0.04 |           |            | 1.4009 |
| 20:4/14:0/18:1 | C55H96O6  | C41H69O4 | 0.58±0.22  | 0.51±0.19 | 0.77±0.14 | 0.68±0.12 | 0.12±0.02 | 0.13±0.03  | 0.4594 |
| 20:4/14:0/18:2 | C55H94O6  | C37H63O4 | 0.66±0.2   | 0.15±0.06 |           |           |           |            | 2.2843 |
| 20:4/14:1/16:0 | C53H92O6  | C39H67O4 | 4.53±1.42  | 0.19±0.04 | 0.5±0.17  | 0.95±0.38 |           |            | 0.3501 |
| 20:4/14:1/18:0 | C55H96O6  | C41H71O4 |            |           |           | 0.14±0.02 |           |            | 1.5777 |
| 20:4/15:0/15:0 | C53H94O6  | C38H65O4 |            | 0.03±0.01 |           | 0.02±0.01 |           |            | 0.3594 |
| 20:4/15:0/16:0 | C54H96O6  | C38H65O4 |            |           |           | 0.7±0.1   |           |            | 1.5703 |
| 20:4/15:0/18:1 | C56H98O6  | C41H69O4 |            | 0.97±0.87 | 0.82±0.15 | 0.68±0.12 |           |            | 1.0901 |
| 20:4/16:0/16:1 | C55H96O6  | C39H67O4 | 10.9±1.89  | 1.93±0.7  | 1.58±0.31 | 1.17±0.21 | 75.2±2.47 | 35.86±2.64 | 0.7725 |
| 20:4/16:0/17:1 | C56H98O6  | C40H67O4 |            | 0.17±0.03 | 0.19±0.02 | 0.21±0.07 |           |            | 1.0939 |
| 20:4/16:0/18:0 | C57H102O6 | C37H71O4 | 8.99±1.55  | 7.85±2.44 | 3.11±1.12 | 3.44±0.78 |           |            | 1.2653 |
| 20:4/16:0/18:1 | C57H100O6 | C41H69O4 | 1.96±0.38  | 2.33±0.8  | 3.21±0.36 | 3.59±0.29 |           | 0.59±0.22  | 0.3744 |
| 20:4/16:0/18:2 | C57H98O6  | C41H67O4 | 0.3±0.06   | 0.8±0.44  | 0.79±0.31 |           |           | 0.3±0.1    | 0.8862 |
| 20:4/16:0/20:0 | C59H106O6 | C43H75O4 | 0.09±0.02  |           | 0.2±0.03  |           |           |            | 0.6400 |

|                |           |          |            |            |            |            |            |            |        |
|----------------|-----------|----------|------------|------------|------------|------------|------------|------------|--------|
| 20:4/16:0/20:2 | C59H102O6 | C43H71O4 | 0.49±0.12  | 0.44±0.16  | 0.65±0.08  | 0.44±0.05  |            | 0.03±0.002 | 0.0303 |
| 20:4/16:0/20:4 | C59H98O6  | C43H67O4 | 0.33±0.07  | 0.04±0.03  |            |            | 0.02±0.002 | 0.26±0.02  | 1.4709 |
| 20:4/16:0/6:0  | C45H78O6  | C29H47O4 |            | 0.78±0.34  | 0.42±0.02  |            |            |            | 0.2216 |
| 20:4/16:0/8:0  | C47H82O6  | C31H51O4 |            | 1.09±0.3   | 1.67±0.13  | 0.94±0.06  |            |            | 1.1811 |
| 20:4/16:1/16:1 | C55H94O6  | C39H65O4 | 2.38±0.44  | 0.34±0.30  |            |            |            |            | 2.0324 |
| 20:4/16:1/18:0 | C57H100O6 | C41H71O4 | 0.92±0.33  | 0.47±0.18  |            | 2.62±0.29  |            | 0.07±0.003 | 1.0066 |
| 20:4/16:1/18:1 | C57H98O6  | C41H69O4 | 0.58±0.21  |            | 0.87±0.13  |            | 0.09±0.06  | 0.13±0.03  | 0.5837 |
| 20:4/16:1/8:0  | C47H80O6  | C27H49O4 |            | 1.2±0.32   | 2.8±0.2    | 1.16±0.09  | 0.06±0.003 |            | 1.1288 |
| 20:4/17:0/18:1 | C58H102O6 | C38H71O4 |            | 0.23±0.06  | 0.2±0.03   | 0.3±0.03   |            |            | 0.9861 |
| 20:4/18:0/18:0 | C59H106O6 | C41H71O4 | 0.17±0.03  |            | 0.47±0.11  |            |            | 0.42±0.02  | 0.9691 |
| 20:4/18:0/18:1 | C59H104O6 | C39H73O4 | 4.17±0.73  | 43.08±5.6  | 6.64±1.74  |            | 3.7±0.89   | 7.09±0.37  | 1.9347 |
| 20:4/18:0/18:2 | C59H102O6 | C41H67O4 | 0.22±0.06  | 0.64±0.3   | 0.46±0.21  | 0.05±0.03  |            | 0.94±0.4   | 0.3655 |
| 20:4/18:0/20:4 | C61H102O6 | C41H71O4 | 0.92±0.33  |            |            |            | 0.87±0.02  | 2.14±0.1   | 0.3341 |
| 20:4/18:0/8:0  | C49H86O6  | C31H51O4 |            | 0.85±0.12  |            | 0.5±0.13   |            |            | 0.4844 |
| 20:4/18:1/18:1 | C59H102O6 | C41H69O4 | 1.96±0.38  | 2.38±0.83  | 3.21±0.36  | 3.58±0.28  |            | 0.26±0.03  | 0.2364 |
| 20:4/18:1/18:2 | C59H100O6 | C39H69O4 | 14.24±1.63 | 12.11±6.47 | 15.58±6.9  |            |            |            | 1.0544 |
| 20:4/18:1/18:3 | C59H98O6  | C41H65O4 | 0.39±0.11  |            |            |            | 0.92±0.19  | 0.72±0.16  | 0.3633 |
| 20:4/18:1/20:4 | C61H100O6 | C41H69O4 | 0.56±0.21  |            |            |            | 0.13±0.02  | 0.76±0.02  | 0.5640 |
| 20:4/18:1/8:0  | C49H84O6  | C41H69O4 |            | 0.2±0.07   | 0.38±0.05  | 0.13±0.02  |            |            | 1.2089 |
| 20:4/18:2/18:2 | C59H98O6  | C41H67O4 | 0.3±0.06   | 0.39±0.36  |            |            |            |            | 2.4860 |
| 20:4/18:2/20:4 | C61H98O6  | C41H67O4 | 0.24±0.13  |            |            |            | 0.89±0.05  | 3.01±0.23  | 0.2951 |
| 20:4/18:3/20:4 | C61H96O6  | C41H65O4 |            |            |            |            |            | 0.39±0.09  | 0.8668 |
| 20:4/20:4/20:4 | C63H98O6  | C43H67O4 |            |            |            |            | 0.85±0.06  | 1.34±0.14  | 0.4091 |
| 20:5/12:0/18:1 | C53H90O6  | C33H61O4 | 0.83±0.58  | 0.37±0.16  | 0.37±0.3   | 14.81±1.32 | 0.29±0.02  |            | 0.0215 |
| 20:5/16:0/16:1 | C55H94O6  | C35H65O4 | 0.03±0.01  | 0.2±0.19   | 17.73±1.32 | 6.12±1.21  | 2.28±0.82  |            | 1.5908 |
| 20:5/16:0/18:1 | C57H98O6  | C37H69O4 | 0.4±0.15   | 5.69±2.2   | 5.65±0.97  | 28.14±4.03 | 1.17±0.36  | 0.95±0.18  | 1.0820 |

|                |           |          |           |           |            |            |            |            |        |
|----------------|-----------|----------|-----------|-----------|------------|------------|------------|------------|--------|
| 20:5/16:1/18:1 | C57H96O6  | C41H67O4 | 0.09±0.05 | 0.05±0.04 |            | 0.02±0.004 | 0.89±0.05  | 2.83±1.28  | 0.8274 |
| 20:5/17:1/17:1 | C57H96O6  | C40H65O4 |           |           |            |            | 0.01±0.001 | 0.01±0.004 | 0.2466 |
| 20:5/18:0/18:1 | C59H102O6 | C39H73O4 |           | 1.65±1.34 |            | 4±0.86     |            | 6.93±3.98  | 0.4637 |
| 20:5/18:1/18:1 | C59H100O6 | C39H71O4 | 5.95±0.66 | 2.67±1.19 | 4.01±0.69  |            | 0.42±0.13  | 1.18±0.53  | 1.3173 |
| 20:5/18:1/18:2 | C59H98O6  | C39H69O4 | 4.77±0.85 |           |            |            | 7.9±0.25   | 15.48±0.63 | 0.2197 |
| 22:6/10:0/14:0 | C49H82O6  | C35H55O4 |           |           |            |            |            | 0.15±0.02  | 0.8768 |
| 22:6/10:0/16:0 | C51H86O6  | C35H55O4 | 0.09±0.02 |           | 0.06±0.03  |            |            | 0.14±0.02  | 0.4885 |
| 22:6/12:0/12:0 | C49H82O6  | C37H59O4 |           |           |            |            |            | 0.07±0.01  | 0.8783 |
| 22:6/12:0/14:0 | C51H86O6  | C37H59O4 | 0.04±0.01 |           |            |            |            | 0.45±0.07  | 0.2136 |
| 22:6/12:0/16:0 | C53H90O6  | C37H59O4 |           |           |            |            |            | 0.39±0.05  | 0.8845 |
| 22:6/12:0/18:1 | C55H92O6  | C33H61O4 | 0.3±0.08  |           |            |            |            | 0.69±0.07  | 0.0337 |
| 22:6/12:0/18:2 | C55H90O6  | C33H59O4 | 0.14±0.04 |           |            |            |            |            | 0.6019 |
| 22:6/12:0/22:6 | C59H90O6  | C37H59O4 |           |           |            |            |            | 1.22±0.18  | 0.8826 |
| 22:6/14:0/14:0 | C53H90O6  | C39H63O4 |           |           |            |            |            | 0.47±0.06  | 0.8861 |
| 22:6/14:0/16:0 | C55H94O6  | C33H63O4 | 0.03±0.01 |           | 1.25±0.58  |            | 0.21±0.03  |            | 0.9747 |
| 22:6/14:0/22:6 | C61H94O6  | C39H63O4 |           |           |            |            |            | 9.57±1.1   | 0.8839 |
| 22:6/14:0/8:0  | C47H78O6  | C25H47O4 |           |           |            |            |            | 0.29±0.04  | 0.8774 |
| 22:6/16:0/16:0 | C57H98O6  | C35H67O4 | 0.12±0.03 | 0.24±0.1  |            | 2.65±1.77  | 1.08±0.62  | 0.23±0.13  | 0.4393 |
| 22:6/16:0/18:1 | C59H100O6 | C37H69O4 | 8.94±1.23 | 6.08±2.12 | 22.61±4.35 |            | 1.43±0.36  | 0.18±0.1   | 1.0537 |
| 22:6/16:0/22:6 | C63H98O6  | C41H67O4 |           |           |            |            | 0.96±0.06  |            | 0.2763 |
| 22:6/16:0/8:0  | C49H82O6  | C41H67O4 |           |           |            |            |            | 0.03±0.01  | 0.8790 |
| 22:6/16:1/22:6 | C63H96O6  | C41H65O4 |           |           |            |            |            | 0.42±0.07  | 0.8788 |
| 22:6/18:0/18:2 | C61H102O6 | C43H71O4 | 0.43±0.21 |           |            |            |            | 0.03±0.002 | 0.9442 |
| 22:6/18:1/18:1 | C61H102O6 | C43H69O4 | 0.3±0.12  |           |            |            |            | 0.09±0.01  | 0.7525 |
| 22:6/18:1/18:2 | C61H100O6 | C39H69O4 | 4.64±0.79 |           |            |            |            | 1.22±0.49  | 0.7938 |
| 22:6/18:2/18:2 | C61H98O6  | C39H67O4 | 2.25±0.54 |           |            |            |            | 1.14±0.18  | 0.6334 |

22:6/22:6/22:6      C69H98O6      C47H67O4      0.51±0.03      1.4±0.11      0.4688

| Class | Molecular lipid | Formula    | MS2 Formula | HM (%)    | DR (%)     | SN (%)     | SH (%)     | IFA (%)    | IFB (%)    | VIP    |
|-------|-----------------|------------|-------------|-----------|------------|------------|------------|------------|------------|--------|
|       | PC20:4/14:0     | C42H76O8NP | C20H31O2    | 6.03±2.33 | 17.29±4.5  | 14.81±1.07 | 20.69±0.59 | 3.57±0.16  | 3.83±0.52  | 0.9388 |
|       | PC20:4/16:0     | C44H80O8NP | C20H31O2    | 55.9±7.18 | 43.37±8.38 | 49.32±2.69 | 44.86±3.16 | 38.44±6.06 | 44.22±2.95 | 0.9356 |
|       | PC20:4/18:0     | C46H84O8NP | C20H31O2    | 8.48±0.36 | 8.59±2.51  | 5.7±2.7    | 7.46±0.22  | 17.62±0.71 | 12.54±0.64 | 0.0014 |
|       | PC20:4/18:1     | C46H82O8NP | C20H31O2    | 9.31±0.45 | 5.03±1.58  | 7.52±0.31  | 7.72±0.42  | 15.42±0.52 | 10.83±0.41 | 0.8441 |
|       | PC20:4/18:2     | C46H80O8NP | C20H31O2    | 2.09±0.14 | 8.97±1.77  | 9.2±0.41   | 8.4±0.51   | 6.88±0.57  | 6.68±0.25  | 1.4421 |
|       | PC20:4/18:3     | C46H78O8NP | C20H31O2    | 1.49±0.18 | 4.82±1.74  | 5.13±1     | 4.06±0.55  | 5.52±0.82  | 7.16±0.72  | 1.2737 |
|       | PC20:4/20:3     | C48H82O8NP | C20H31O2    | 1.18±0.05 | 4.11±0.91  | 4.59±0.59  | 4.85±3.79  | 5.3±0.59   | 7.25±0.43  | 1.2096 |
|       | PC20:5/18:0     | C46H82O8NP | C20H29O2    |           |            | 0.7±0.07   | 0.82±0.17  | 3.11±0.13  | 3.15±0.24  | 1.2802 |
|       | PC20:5/18:1     | C46H80O8NP | C20H29O2    |           |            |            | 1.14±0.35  | 4.14±0.36  | 4.34±0.63  | 0.4129 |
|       | PC22:6/16:0     | C46H80O8NP | C22H31O2    | 2.71±0.34 |            | 0.59±0.07  |            |            |            | 0.1617 |
|       | PC22:6/18:0     | C48H84O8NP | C22H31O2    | 5.61±0.52 |            |            |            |            |            | 1.0810 |
|       | PC22:6/18:1     | C48H82O8NP | C22H31O2    | 4.13±0.17 | 4.05±2.05  | 1.41±0.07  |            |            |            | 1.4198 |
|       | PC22:6/18:2     | C48H80O8NP | C22H31O2    | 3.07±0.44 | 3.77±2.24  | 1.03±0.16  |            |            |            | 1.5160 |
|       | PE20:4/14:0     | C39H70O8NP | C20H31O2    |           | 2.01±1.33  |            |            | 1.05±0.12  | 0.7±0.04   | 1.1839 |
|       | PE20:4/15:0     | C40H72O8NP | C20H31O2    | 0.59±0.09 | 1.23±0.9   | 0.99±0.04  | 0.49±0.01  | 1±0.03     | 0.92±0.03  | 0.4717 |
|       | PE20:4/16:0     | C41H74O8NP | C20H31O2    | 7.58±1.05 | 20.29±2.84 | 20.97±0.74 | 27.08±0.48 | 18.65±0.71 | 16.15±0.72 | 1.1684 |
| PL    | PE20:4/16:1     | C41H72O8NP | C20H31O2    | 0.16±0.03 | 2.74±1.09  | 3.56±0.16  | 5.89±0.12  | 1.07±0.11  | 0.8±0.04   | 1.2408 |
|       | PE20:4/17:0     | C42H76O8NP | C20H31O2    | 0.42±0.03 | 0.54±0.11  | 0.28±0.01  | 0.88±0.02  | 1.37±0.29  | 1.33±0.25  | 0.1624 |
|       | PE20:4/17:1     | C42H74O8NP | C20H31O2    | 0.32±0.03 | 1.12±0.11  | 0.2±0.04   | 0.43±0.1   | 2.76±0.51  | 0.44±0.03  | 1.0497 |
|       | PE20:4/18:0     | C43H78O8NP | C20H31O2    | 26.35±1.5 | 14.93±2.84 | 17.9±1.28  | 16.53±0.38 | 20.4±1.34  | 20.34±0.69 | 0.4996 |

|             |            |          |            |            |            |            |            |            |        |
|-------------|------------|----------|------------|------------|------------|------------|------------|------------|--------|
| PE20:4/18:1 | C43H76O8NP | C20H31O2 | 13.23±1.89 | 23.09±3.03 | 22.34±0.56 | 20.67±0.45 | 20.48±2.41 | 20.42±0.59 | 1.0438 |
| PE20:4/18:2 | C43H74O8NP | C20H31O2 | 2.08±0.87  | 4.72±1.58  | 6.69±0.95  | 7.84±1.66  | 14.13±3.2  | 14.4±3.95  | 1.2226 |
| PE20:4/20:1 | C45H80O8NP | C20H31O2 | 17.33±7.42 | 9.44±1.29  | 13.49±0.79 | 12.61±1.1  | 12.84±6.64 | 9.6±7.98   | 0.4092 |
| PE20:4/20:3 | C45H76O8NP | C20H31O2 | 1.52±0.62  | 3.14±1.31  | 0.47±0.04  | 0.61±0.02  | 1.55±0.08  | 1.52±0.3   | 1.6500 |
| PE20:4/20:4 | C45H74O8NP | C20H31O2 | 1.84±0.7   |            | 1.37±0.61  | 0.29±0.02  | 1.54±0.06  | 1.27±0.12  | 0.7949 |
| PE20:5/14:0 | C39H68O8NP | C20H29O2 |            | 1.06±0.38  | 1.68±0.13  | 0.35±0.03  | 2.68±0.09  | 4.16±1.62  | 0.9078 |
| PE20:5/16:0 | C41H72O8NP | C20H29O2 | 2.53±1.01  | 0.62±0.18  | 1.1±0.59   | 1.21±0.06  | 0.48±0.07  | 1.21±0.54  | 0.2688 |
| PE20:5/18:1 | C43H74O8NP | C20H29O2 | 0.3±0.14   | 1.68±0.62  | 2.63±0.15  | 3.56±2.15  |            | 5.26±1.94  | 1.1235 |
| PE22:6/16:0 | C43H74O8NP | C22H31O2 | 3.92±0.97  | 4.98±2.27  | 2.4±0.1    | 0.48±0.04  |            | 0.68±0.07  | 0.5183 |
| PE22:6/18:0 | C45H78O8NP | C22H31O2 | 16.34±3.62 | 2.23±0.98  | 1.09±0.07  | 0.18±0.01  |            |            | 0.9830 |
| PE22:6/18:1 | C45H76O8NP | C22H31O2 | 5.08±1.12  | 5.92±2.47  | 2.84±0.17  | 0.58±0.01  |            | 0.8±0.03   | 0.5703 |
| PE22:6/18:2 | C45H74O8NP | C22H31O2 | 0.41±0.15  | 0.26±0.17  |            | 0.32±0.13  |            |            | 1.1471 |
